# Supplementary material
Source: Atypon-hosted journal article supplement (doi:10.1287/mksc.2024.0930)
Supplement: mksc.2024.0930.sm1.pdf [file mksc.2024.0930.sm1.pdf]

# Online Appendix to Algorithmic Targeting and the Precision-Recall Trade-off

Ganesh Iyer, Yunfei (Jesse) Yao, Zemin (Zachary) Zhong

January, 2026

## Alternative Correlation Structure

We now consider an alternative correlation structure. Suppose firm one's prediction for a given consumer is  $p_1$ . Then, with probability  $\rho$ , firm two's prediction is also  $p_1$ , and with probability  $1 - \rho$ , firm two's prediction is uniformly drawn from  $f(p)$ . Under this alternative correlation structure, the expected payoff of a firm from targeting a probability  $p$  consumer is  $[\rho q(p) + (1 - \rho)a]pw + [1 - \rho q(p) - (1 - \rho)a]pv - c$  rather than  $[\rho q(p) + (1 - \rho)R]pw + [1 - \rho q(p) - (1 - \rho)R]pv - c$ .

All the main results in the paper hold under this alternative correlation structure. We present proof of those results below.

**Proof of Lemma 1.** The proof is the same as the proof in the appendix, except that one needs to replace  $R$  with  $a$  in the formulas. ■

### **Proof of Lemma 2.**

Existence:

The proof is the same as the proof of Lemma 2 in the appendix.

Uniqueness:

1. Firms never target any consumer for sure ( $\bar{p} = 1$ )

$$\begin{aligned}
a &= \int_{\underline{p}}^1 f(p)q(p)dp \\
&= \int_{\frac{c}{v-(1-\rho)(v-w)a}}^1 f(p) \frac{-c/p + (1-\rho)aw + [1 - (1-\rho)a]v}{\rho(v-w)} dp \\
&= \int_{\frac{c}{v-(1-\rho)(v-w)a}}^1 \frac{f(p)}{\rho(v-w)} [-c/p + v - (1-\rho)(v-w)a] dp
\end{aligned}$$

For any fixed  $\rho$ , define:

$$G(a) := \int_{\frac{c}{v-(1-\rho)(v-w)a}}^1 \frac{f(p)}{\rho(v-w)} [-c/p + v - (1-\rho)(v-w)a] dp - a$$

$$\text{Then, } G(0) = \int_{\frac{c}{v}}^1 \frac{f(p)}{\rho(v-w)} [v - c/p] dp > 0$$

$$\begin{aligned}
G'(a) &= \int_{\frac{c}{v-(1-\rho)(v-w)a}}^1 -(1-\rho)(v-w) \frac{f(p)}{\rho(v-w)} dp - \\
&\quad c \left( -\frac{(1-\rho)(v-w)}{[v - (1-\rho)(v-w)a]^2} \right) [v - (1-\rho)(v-w)a - \frac{c}{v-(1-\rho)(v-w)a}] \frac{f(\frac{c}{v-(1-\rho)(v-w)a})}{\rho(v-w)} \\
&= -\frac{1-\rho}{\rho} [1 - F(\frac{c}{v-(1-\rho)(v-w)a})] - 1 < 0
\end{aligned}$$

Uniqueness then follows.

2. Firms target high-probability consumers for sure ( $\bar{p} < 1$ )

$$\begin{aligned}
&[\rho + (1-\rho)a(\rho)]\bar{p}w + [1 - \rho - (1-\rho)a(\rho)]\bar{p}v - c = 0 \\
\Rightarrow \bar{p} &= \frac{c}{[\rho + (1-\rho)a(\rho)]w + [1 - \rho - (1-\rho)a(\rho)]v} \tag{1}
\end{aligned}$$

$$\begin{aligned}
a &= \int_{\bar{p}}^1 f(p)dp + \int_{\underline{p}}^{\bar{p}} f(p)q(p)dp \\
&= 1 - F(\bar{p}) + \int_{\underline{p}}^{\bar{p}} f(p)q(p)dp
\end{aligned}$$

For any fixing  $\rho$ , define:

$$H(a) := 1 - F(\bar{p}) + \int_{\underline{p}}^{\bar{p}} f(p)q(p)dp - a$$

Then,  $H(0) = 1 - F(\bar{p}) + \int_{c/v}^{\bar{p}} f(p)q(p)dp > 0$

$$\begin{aligned} H'(a) &= c \frac{-(1-\rho)(v-w)}{[v-(1-\rho)(v-w)a]^2} q\left(\frac{c}{v-(1-\rho)(v-w)a}\right) f\left(\frac{c}{v-(1-\rho)(v-w)a}\right) + \\ &\quad \int_{\frac{c}{v-(1-\rho)(v-w)a}}^{\bar{p}} -(1-\rho)(v-w) \frac{f(p)}{\rho(v-w)} dp - 1 \\ &= -(1-\rho)(v-w) \left[ \frac{cq\left(\frac{c}{v-(1-\rho)(v-w)a}\right) f\left(\frac{c}{v-(1-\rho)(v-w)a}\right)}{[v-(1-\rho)(v-w)a]^2} + \frac{F(\bar{p}) - F\left(\frac{c}{v-(1-\rho)(v-w)a}\right)}{\rho(v-w)} \right] - 1 \\ &< 0 \end{aligned}$$

Uniqueness then follows.

To show that there exists  $\hat{\rho} \in [0, \frac{v-c}{v-w}]$  such that firms never target any consumer for sure if and only if  $\rho \geq \hat{\rho}$ , we just need to show the following claim:

If firms never target any consumer for sure for  $\rho = \rho_s$ , then they also never target any consumer for sure for any  $\rho_l > \rho_s$ .

Suppose not. When  $\rho = \rho_l$ , Lemma 1 implies that there exists  $\bar{p}_l$  and  $\underline{p}_l$  such that firms target consumers with probabilities  $p \geq \bar{p}_l$  for sure and mix for consumers with probabilities between  $\underline{p}_l$  and  $\bar{p}_l$ . Thus,  $q_l(p) = 1 > q_s(p)$ ,  $\forall p \geq \bar{p}_l$ . The proof of the comparative statics results will show that  $q'_l(p) < q'_s(p)$ ,  $\forall p \in (\underline{p}_s, \bar{p}_l)$ . So,  $q_l(p) > q_s(p)$ ,  $\forall p \in [\underline{p}_s, 1] \Rightarrow a_l > a_s$ . A contradiction to the comparative statics that the overall targeting probability decreases in  $\rho$ , which will be shown in the proof of the comparative statics results. ■

**Proof of Proposition 1.** The same as the proof of Proposition 1 in the appendix.

■

**Proof of the comparative statics results.**

1. Firms never target any consumer for sure ( $\bar{p} = 1$ )

Comparative statics of  $a$  w.r.t.  $\rho$ :

In equilibrium,  $G(a) = 0$ . By the implicit function theorem,  $\frac{\partial a}{\partial \rho} = -\frac{\frac{\partial G}{\partial \rho}}{\frac{\partial G}{\partial a}}$ . We have shown that  $\frac{\partial G}{\partial a}$  is negative.

$$\frac{\partial G}{\partial \rho} = \int_{\frac{c}{v-(1-\rho)(v-w)a}}^1 \frac{f(p)}{v-w} [-c/p + v - (1-\rho)(v-w)a] (-1/\rho^2) + \frac{f(p)a}{\rho} dp$$

$$\begin{aligned}
&= \int_{\frac{c}{v-(1-\rho)(v-w)a}}^1 \frac{f(p)}{\rho^2(v-w)} [c/p - v + (1-\rho)(v-w)a + \rho a(v-w)] dp \\
&\propto \int_{\frac{c}{v-(1-\rho)(v-w)a}}^1 f(p)[-q(p) + a] dp \\
&= a \int_{\frac{c}{v-(1-\rho)(v-w)a}}^1 f(p) dp - \int_{\frac{c}{v-(1-\rho)(v-w)a}}^1 f(p)q(p) dp \\
&= a \int_{\frac{c}{v-(1-\rho)(v-w)a}}^1 f(p) dp - a \\
&= -F\left(\frac{c}{v-(1-\rho)(v-w)a}\right)a < 0.
\end{aligned}$$

Therefore,  $\frac{\partial a}{\partial \rho} < 0$ .

Comparative statics of  $\underline{p}$  w.r.t.  $\rho$ :

We have shown that the overall targeting probability  $a$  decreases when  $\rho$  increases. Therefore,  $v - (1 - \rho)(v - w)a$  increases. Equation (??) then implies that  $\underline{p}$  decreases in  $\rho$ .

Comparative statics of the precision wrt  $\rho$ :

The same as the proof in the appendix except that we use  $\int_{\underline{p}_s}^1 q_s(p)f(p)dp = a_s > a_l = \int_{\underline{p}_l}^1 q_l(p)f(p)dp > \int_{\underline{p}_s}^1 q_l(p)f(p)dp$  and  $q_l(\underline{p}_s) > q_l(\underline{p}_l) = 0 = q_s(\underline{p}_s)$  to argue that

$$\text{there must exist } \tilde{p} \in (\underline{p}_s, 1) \text{ such that } \begin{cases} q_s(p) > q_l(p), \text{ if } p \in (\tilde{p}, 1] \\ \tilde{q} := q_s(\tilde{p}) = q_l(\tilde{p}) \\ q_s(p) < q_l(p), \text{ if } p \in [\underline{p}_s, \tilde{p}) \end{cases}.$$

Proof of the Comparative statics of the recall wrt  $\rho$ :

$$\begin{aligned}
&\text{Suppose } \rho > \frac{v-c}{v-w}. \text{ We have shown that } \frac{\int_{\underline{p}_l}^1 pq_l(p)f(p)dp}{a_l} < \frac{\int_{\underline{p}_s}^1 pq_s(p)f(p)dp}{a_s}. \text{ Since } a_s > \\
&a_l, \text{ we have } \frac{\int_{\underline{p}_l}^1 pq_l(p)f(p)dp}{a_l} = \frac{\int_{\underline{p}_l}^1 pq_l(p)f(p)dp}{a_s} \frac{a_s}{a_l} < \frac{\int_{\underline{p}_s}^1 pq_s(p)f(p)dp}{a_s} \Rightarrow \frac{\int_{\underline{p}_l}^1 pq_l(p)f(p)dp}{a_s} < \\
&\frac{\int_{\underline{p}_s}^1 pq_s(p)f(p)dp}{a_s} \Rightarrow \frac{\int_{\underline{p}_l}^1 pq_l(p)f(p)dp}{\mu_0} < \frac{\int_{\underline{p}_s}^1 pq_s(p)f(p)dp}{\mu_0}.
\end{aligned}$$

## 2. Firms target high-probability consumers for sure ( $\bar{p} < 1$ )

Comparative statics of  $a$  w.r.t.  $\rho$ :

In equilibrium,  $H(a) = 0$ . By the implicit function theorem,  $\frac{\partial a}{\partial \rho} = -\frac{\frac{\partial H}{\partial \rho}}{\frac{\partial H}{\partial a}}$ . We have

shown that  $\frac{\partial H}{\partial a}$  is negative.

$$\begin{aligned}\frac{\partial H}{\partial \rho} &= -f(\bar{p})\frac{\partial \bar{p}}{\partial \rho} + \frac{\partial \bar{p}}{\partial \rho}q(\bar{p})f(\bar{p}) - \\ &\quad \frac{c}{[v - (1 - \rho)(v - w)a]^2}(v - w)aq\left(\frac{c}{v - (1 - \rho)(v - w)a}\right)f\left(\frac{c}{v - (1 - \rho)(v - w)a}\right) \\ &= -\frac{c}{[v - (1 - \rho)(v - w)a]^2}(v - w)aq\left(\frac{c}{v - (1 - \rho)(v - w)a}\right)f\left(\frac{c}{v - (1 - \rho)(v - w)a}\right) \\ &< 0\end{aligned}$$

Therefore,  $\frac{\partial a}{\partial \rho} < 0$ .

Comparative statics of  $\underline{p}$  w.r.t.  $\rho$ :

We have shown that the overall targeting probability  $a$  decreases when  $\rho$  increases. Therefore,  $v - (1 - \rho)(v - w)a$  increases. Equation (??) then implies that  $\underline{p}$  decreases in  $\rho$ .

Comparative statics of  $\bar{p}$  w.r.t.  $\rho$ :

Consider any given  $\rho_l > \rho_s$  such that the corresponding  $\bar{p}_l$  and  $\bar{p}_s$  are lower than 1. We prove by contradiction. suppose  $\bar{p}_l \leq \bar{p}_s$ . The overall targeting probability corresponding to  $\rho_l$  is  $a_l = \int_{\underline{p}_l}^1 f(p)dp + \int_{\underline{p}_l}^{\bar{p}_l} q_l(p)f(p)dp$ . The overall targeting probability corresponding to  $\rho_s$  is  $a_s = \int_{\underline{p}_s}^1 f(p)dp + \int_{\underline{p}_s}^{\bar{p}_s} q_s(p)f(p)dp$ . We first show that  $q_l(p) > q_s(p), \forall p \in (\underline{p}_s, \bar{p}_l)$ .

Observe that  $q_l(\bar{p}_l) = 1 > q_s(\bar{p}_l)$ . For any  $p \in (\underline{p}_s, \bar{p}_l)$ , we have

$$\begin{aligned}q_l(p) &= q_l(\bar{p}_l) + \frac{c}{\rho_l(v - w)}(1/\bar{p}_l - 1/p) \\ &> q_s(\bar{p}_l) + \frac{c}{\rho_s(v - w)}(1/\bar{p}_l - 1/p) = q_s(\bar{p}_l)\end{aligned}$$

Hence,

$$\begin{aligned}a_l &= \int_{\underline{p}_s}^1 f(p)dp + \int_{\underline{p}_l}^{\bar{p}_s} f(p)dp + \int_{\underline{p}_l}^{\bar{p}_l} q_l(p)f(p)dp \\ &> \int_{\underline{p}_s}^1 f(p)dp + \int_{\underline{p}_l}^{\bar{p}_s} q_s(p)f(p)dp + \int_{\underline{p}_s}^{\bar{p}_l} q_l(p)f(p)dp\end{aligned}$$

$$> \int_{\bar{p}_s}^1 f(p)dp + \int_{\bar{p}_l}^{\bar{p}_s} q_s(p)f(p)dp + \int_{\underline{p}_s}^{\bar{p}_l} q_s(p)f(p)dp = a_s$$

But we have shown that  $a$  decreases in  $\rho$ . A contradiction. Therefore,  $\bar{p}_l > \bar{p}_s$ .

Comparative statics of the profit w.r.t.  $\rho$ :

The same as the proof in the appendix, except that one needs to replace  $R$  with  $a$  in the formulas.

■

**Proof of Proposition 2.** The same as the proof in the appendix, except that one needs to replace  $R$  with  $a$  in the formulas. ■

**Proof of Proposition 3.** The threshold for a monopoly equilibrium to exist is now  $\rho \geq \frac{a_m w + (1 - a_m)v - c}{(1 - a_m)(v - w)}$  rather than  $\rho \geq \frac{R_m w + (1 - R_m)v - c}{(1 - R_m)(v - w)}$ .

The proof is the same as the proof in the appendix,, except that one needs to replace  $R$  with  $a$  in the formulas. ■
